# Supplementary material for: Nitridochromate(iv) fluoride – LiCa8[CrN3]2N2F
Source: Royal Society of Chemistry journal article supplement (doi:10.1039/d4dt00283k), 2024-01-01
Supplement: d4dt00283k1.pdf [file d4dt00283k1.pdf]

Supporting information

**Nitridochromate(IV) fluoride -  $\text{LiCa}_8[\text{CrN}_3]_2\text{N}_2\text{F}$**

Natalia Glorizova<sup>a</sup>, Yurii Prots<sup>a</sup>, Mitja Krnel<sup>a</sup>, Ulrich Burkhardt<sup>a</sup>, Marcus Schmidt<sup>a</sup>, Alim Ormeci<sup>a</sup>, Franziska Jach<sup>a,b,c</sup>,  
Peter Höhn<sup>\*a</sup> and Yuri Grin<sup>a</sup>

<sup>a</sup>*Max-Planck-Institut für Chemische Physik fester Stoffe, Nöthnitzer Straße 40, 01187 Dresden, Germany*

<sup>b</sup>*Faculty of Chemistry and Food Chemistry, Technische Universität Dresden, 01062 Dresden, Germany*

<sup>c</sup>*Fraunhofer Institute for Integrated Systems and Device Technology IISB, Schottkystraße 10, 91058 Erlangen, Germany*

## Table of Contents

|                                                                                                                                                                                                                                                                            |    |
|----------------------------------------------------------------------------------------------------------------------------------------------------------------------------------------------------------------------------------------------------------------------------|----|
| <b>Figure S1.</b> The projection of the crystal structure of $\text{LiCa}_8[\text{CrN}_3]_2\text{N}_2\text{F}$ along (a) [010] and (b) [001] direction. Anisotropic displacement parameters correspond to 98 % probability .....                                           | 3  |
| <b>Table S1.</b> Anisotropic displacement parameters ( $\text{\AA}^2$ ) of $\text{LiCa}_8[\text{Cr}^{\text{IV}}\text{N}_3]_2\text{N}_2\text{F}$ .....                                                                                                                      | 4  |
| <b>Table S2.</b> Interatomic distances in $\text{LiCa}_8[\text{CrN}_3]_2\text{N}_2\text{F}$ .....                                                                                                                                                                          | 5  |
| <b>Figure S2.</b> Coordination of $[\text{CrN}_3]^{x-}$ units in (a) $\text{LiCa}_8[\text{CrN}_3]_2\text{N}_2\text{F}$ , (b) $\text{Sr}_3[\text{CrN}_3]$ , and (c) $\text{Ca}_3[\text{CrN}_3]$ , viewed perpendicular (top), and along (bottom) trigonal planar units..... | 6  |
| <b>Figure S3.</b> Atomic coordination in the ideal structure of $\text{LiCa}_8[\text{Cr}^{\text{IV}}\text{N}_3]_2\text{N}_2\text{F}$ structure .....                                                                                                                       | 7  |
| <b>Table S3.</b> Expected internal vibrational modes for $[\text{CrN}_3]^{5-}$ anion within $\text{LiCa}_8[\text{CrN}_3]_2\text{N}_2\text{F}$ crystal structure according to molecular site group analysis .....                                                           | 8  |
| <b>Figure S4.</b> Inverse susceptibility vs. temperature fitted with Curie equation of $\text{LiCa}_8[\text{CrN}_3]_2\text{N}_2\text{F}$ .....                                                                                                                             | 9  |
| <b>Figure S5.</b> Electrical resistivity of $\text{LiCa}_8[\text{CrN}_3]_2\text{N}_2\text{F}$ in the temperature range 120 K to 300 K.....                                                                                                                                 | 10 |
| <b>Table S4.</b> Synthesis of $\text{LiCa}_8[\text{CrN}_3]_2\text{N}_2\text{F}$ .....                                                                                                                                                                                      | 11 |
| <b>Figure S6.</b> PXRD of ground crystals of $\text{LiCa}_8[\text{CrN}_3]_2\text{N}_2\text{F}$ (in blue) and theoretical pattern from single crystal data (in red). .....                                                                                                  | 12 |
| References .....                                                                                                                                                                                                                                                           | 13 |

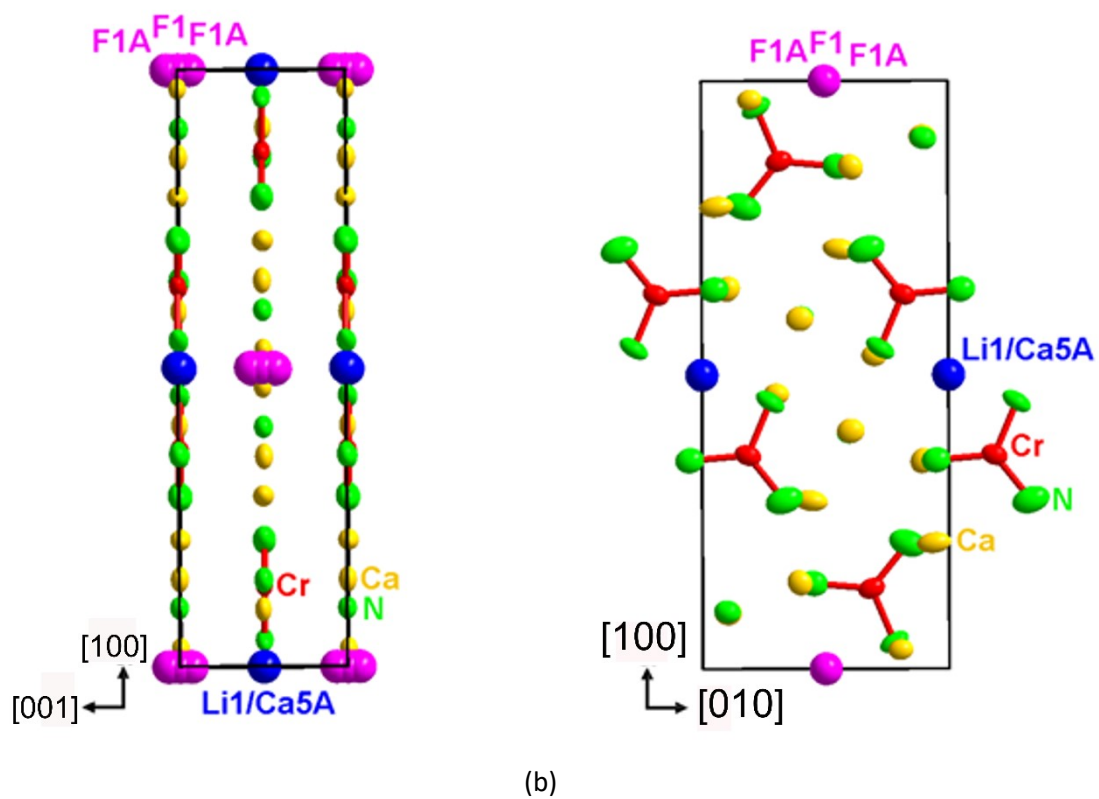

**Figure S1.** The projection of the crystal structure of  $\text{LiCa}_8[\text{CrN}_3]_2\text{N}_2\text{F}$  along (a)  $[010]$  and (b)  $[001]$  direction. Anisotropic displacement parameters correspond to 98 % probability.

**Table S1.** Anisotropic displacement parameters ( $\text{\AA}^2$ ) of  $\text{LiCa}_8[\text{Cr}^{\text{IV}}\text{N}_3]_2\text{N}_2\text{F}$ .

| atom | $U_{11}$   | $U_{22}$   | $U_{33}$   | $U_{23}$ | $U_{13}$ | $U_{12}$     |
|------|------------|------------|------------|----------|----------|--------------|
| Cr1  | 0.0091(2)  | 0.0140(2)  | 0.0058(2)  | 0        | 0        | -0.00199(16) |
| Ca1  | 0.0120(3)  | 0.0150(3)  | 0.0056(3)  | 0        | 0        | 0.0002(2)    |
| Ca2  | 0.0088(3)  | 0.0126(3)  | 0.0065(3)  | 0        | 0        | 0.00049(19)  |
| Ca3  | 0.0130(3)  | 0.0125(3)  | 0.0066(3)  | 0        | 0        | -0.0011(2)   |
| Ca4  | 0.0089(3)  | 0.0234(3)  | 0.0086(3)  | 0        | 0        | 0.0019(2)    |
| N1   | 0.0098(10) | 0.0160(13) | 0.0066(12) | 0        | 0        | -0.0058(9)   |
| N2   | 0.0128(12) | 0.0170(13) | 0.0073(12) | 0        | 0        | 0.0010(9)    |
| N3   | 0.0151(13) | 0.0276(16) | 0.0107(13) | 0        | 0        | 0.0049(11)   |
| N4   | 0.0101(11) | 0.0144(12) | 0.0072(11) | 0        | 0        | -0.0008(9)   |

**Table S2.** Selected interatomic distances in LiCa<sub>8</sub>[CrN<sub>3</sub>]<sub>2</sub>N<sub>2</sub>F.

| atoms |       |    | <i>d</i> , Å | atoms |       |    | <i>d</i> , Å |
|-------|-------|----|--------------|-------|-------|----|--------------|
| Cr1   | -N3   | ×1 | 1.728(3)     | Ca4   | -N4   | ×1 | 2.353(3)     |
|       | -N1   | ×1 | 1.730(3)     |       | -N2   | ×1 | 2.470(3)     |
|       | -N2   | ×1 | 1.735(3)     |       | -N3   | ×2 | 2.5933(10)   |
| Cr1   | -Ca5A | ×1 | 2.7535(5)    |       | -N3   | ×1 | 3.152(3)     |
|       | -Ca1  | ×1 | 3.1511(9)    | N1    | -Ca5A | ×1 | 2.181(3)     |
|       | -Ca4  | ×1 | 3.1791(8)    | N1    | -Li1  | ×1 | 2.181(3)     |
|       | -Ca2  | ×2 | 3.1948(5)    | N2    | -Li1  | ×1 | 2.571(3)     |
|       | -Ca3  | ×2 | 3.2666(6)    | F1    | -F1A  | ×1 | 0.33(2)      |
|       | -Ca4  | ×1 | 3.3796(6)    | F1    | -Li1  | ×2 | 2.4716(2)    |
| Cr1   | -Li1  | ×1 | 2.7535(5)    | F1    | -Ca5A | ×1 | 2.4716(2)    |
| Ca1   | -N4   | ×2 | 2.4721(2)    | F1A   | -F1A  | ×1 | 0.67(5)      |
|       | -N1   | ×1 | 2.549(3)     | F1    | -Ca5A | ×1 | 2.14(2)      |
|       | -N1   | ×1 | 2.623(3)     | F1A   | -Li1  | ×1 | 2.14(2)      |
|       | -N2   | ×1 | 2.689(3)     |       |       |    |              |
|       | -N3   | ×1 | 2.870(3)     |       |       |    |              |
| Ca1   | -Li1  | ×1 | 3.3574(7)    |       |       |    |              |
| Ca1   | -Ca3  | ×2 | 3.3915(6)    |       |       |    |              |
|       | -Ca2  | ×2 | 3.4022(6)    |       |       |    |              |
| Ca2   | -F1   | ×1 | 2.2911(6)    |       |       |    |              |
|       | -F1A  | ×2 | 2.315(3)     |       |       |    |              |
| Ca2   | -N4   | ×1 | 2.384(3)     |       |       |    |              |
|       | -N4   | ×1 | 2.468(3)     |       |       |    |              |
|       | -N1   | ×2 | 2.4904(4)    |       |       |    |              |
| Ca2   | -Ca2  | ×1 | 3.1080(12)   |       |       |    |              |
|       | -Ca4  | ×1 | 3.3391(9)    |       |       |    |              |
| Ca2   | -Li1  | ×1 | 3.3702(5)    |       |       |    |              |
| Ca3   | -N4   | ×1 | 2.325(3)     |       |       |    |              |
|       | -N3   | ×1 | 2.496(3)     |       |       |    |              |
|       | -N2   | ×2 | 2.5040(5)    |       |       |    |              |
| Ca3   | -F1   | ×1 | 2.6789(6)    |       |       |    |              |
|       | -F1A  | ×2 | 2.700(3)     |       |       |    |              |

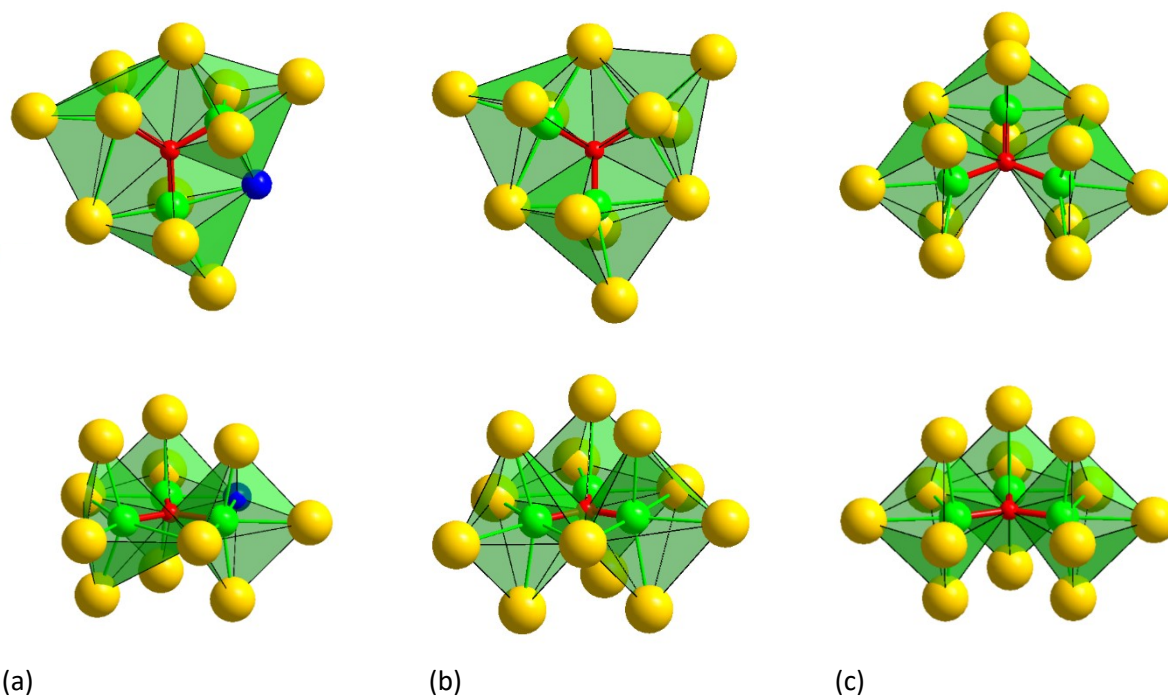

**Figure S2.** Coordination of  $[\text{CrN}_3]^{x-}$  units in (a)  $\text{LiCa}_8[\text{CrN}_3]_2\text{N}_2\text{F}$ , (b)  $\text{Sr}_3[\text{CrN}_3]$ , and (c)  $\text{Ca}_3[\text{CrN}_3]$ , viewed perpendicular (top), and along (bottom) trigonal planar units. Red spheres: Cr; green spheres: N; blue spheres: Li; yellow spheres: alkaline-earth metals.

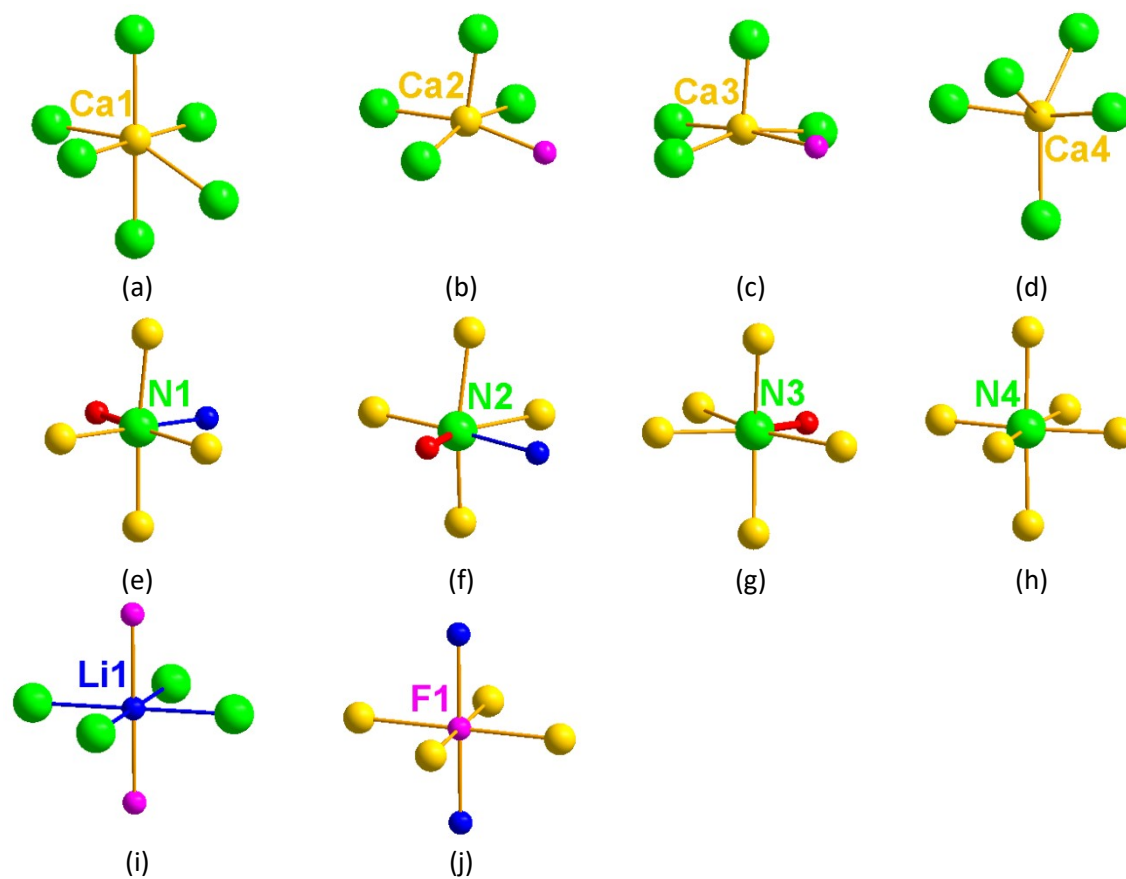

**Figure S3.** Atomic coordination in the ideal structure of  $\text{LiCa}_8[\text{Cr}^{\text{IV}}\text{N}_3]_2\text{N}_2\text{F}$  structure. Red spheres: Cr; green spheres: N; blue spheres: Li; yellow spheres: Ca; purple spheres: F.

**Table S3.** Expected internal vibrational modes for  $[\text{CrN}_3]^{5-}$  anion within  $\text{LiCa}_8[\text{CrN}_3]_2\text{N}_2\text{F}$  crystal structure according to molecular site group analysis.

| molecular vibration      | molecular point group | molecular selection rules | site symmetry | factor group | solid-state selection rules | number of expected bands |       |
|--------------------------|-----------------------|---------------------------|---------------|--------------|-----------------------------|--------------------------|-------|
|                          | $D_{3h}$              |                           | $C_s$         | $D_{2h}$     |                             | IR                       | Raman |
| $\nu_s(\text{CrN}_3)$    | $A_1'$                | R                         | $A'$          | $A_g$        | R                           |                          |       |
|                          |                       |                           |               | $B_{1g}$     | R                           |                          |       |
|                          |                       |                           |               | $B_{2u}$     | IR                          |                          |       |
|                          |                       |                           |               | $B_{3u}$     | IR                          |                          |       |
| $\nu_{as}(\text{CrN}_3)$ | $E'$                  | IR, R                     | $2 A'$        | $2 A_g$      | 2 R                         | 6                        | 6     |
|                          |                       |                           |               | $2 B_{1g}$   | 2 R                         |                          |       |
|                          |                       |                           |               | $2 B_{2u}$   | 2 IR                        |                          |       |
|                          |                       |                           |               | $2 B_{3u}$   | 2 IR                        |                          |       |
| $\delta(\text{NCrN})$    | $E'$                  | IR, R                     | $2 A'$        | $2 A_g$      | 2 R                         |                          |       |
|                          |                       |                           |               | $2 B_{1g}$   | 2 R                         | 4                        | 4     |
|                          |                       |                           |               | $2 B_{2u}$   | 2 IR                        |                          |       |
|                          |                       |                           |               | $2 B_{3u}$   | 2 IR                        |                          |       |
| $\gamma(\text{NCrN})$    | $A_2''$               | IR                        | $A''$         | $A_u$        | -                           |                          |       |
|                          |                       |                           |               | $B_{1u}$     | IR                          |                          |       |
|                          |                       |                           |               | $B_{2g}$     | R                           | 1                        | 2     |
|                          |                       |                           |               | $B_{3g}$     | R                           |                          |       |



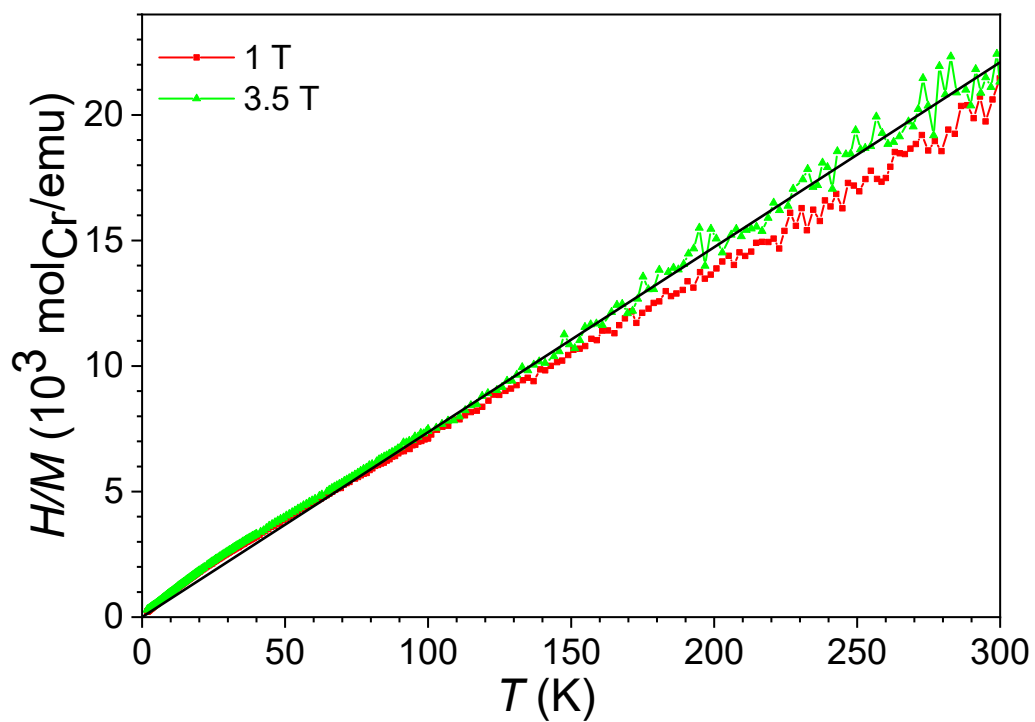

**Figure S4.** Inverse susceptibility vs. temperature fitted with Curie equation (black line) of  $\text{LiCa}_8[\text{CrN}_3]_2\text{N}_2\text{F}$ .

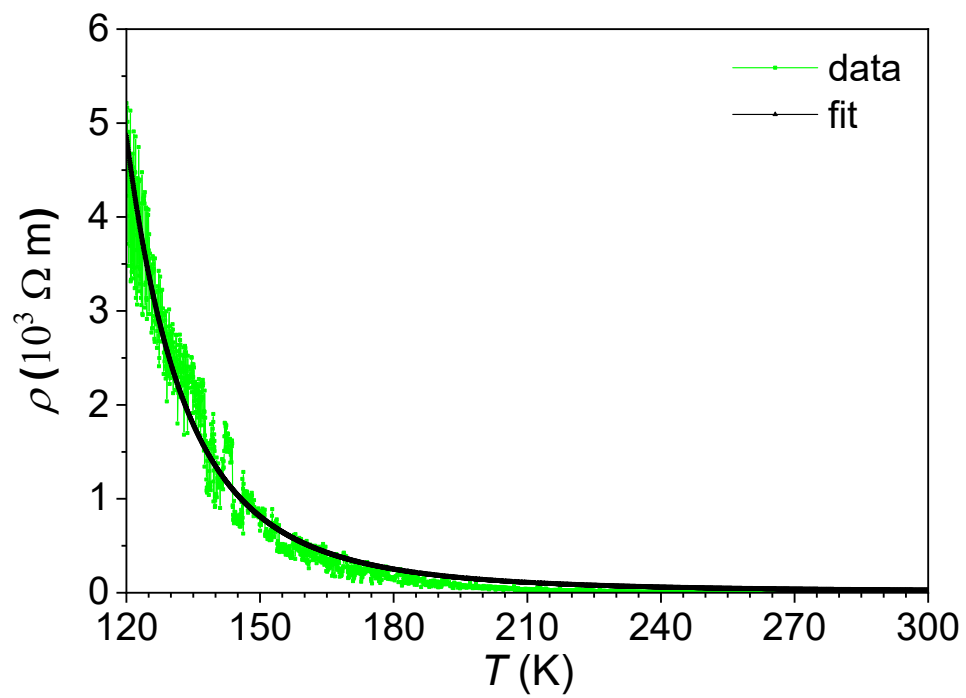

**Figure S5.** Electrical resistivity of  $\text{LiCa}_8[\text{CrN}_3]_2\text{N}_2\text{F}$  in the temperature range 120 K to 300 K.

**Table S4.** Synthesis of  $\text{LiCa}_8[\text{CrN}_3]_2\text{N}_2\text{F}$ .

| sample | starting materials / molar ratio |                         |     |                |                       |    | obtained phases                                                                                                                       |
|--------|----------------------------------|-------------------------|-----|----------------|-----------------------|----|---------------------------------------------------------------------------------------------------------------------------------------|
|        | $\text{Ca}_2\text{N}$            | $\text{Ca}_3\text{N}_2$ | Cr  | $\text{CaF}_2$ | $\text{Li}_3\text{N}$ | Li |                                                                                                                                       |
| 1      | 1                                | 0.6                     | 0.9 | 0.5            | 1.5                   | 22 | $\text{LiCa}_8[\text{CrN}_3]_2\text{N}_2\text{F}$ , $\text{Li}_3\text{N}$                                                             |
| 2      | -                                | 1                       | 1.3 | 0.9            | 1.8                   | 12 | $\text{LiCa}_8[\text{CrN}_3]_2\text{N}_2\text{F}$ , $\text{Ca}_6[\text{Cr}_2\text{N}_6]\text{F}$ , <sup>1</sup> $\text{Li}_3\text{N}$ |

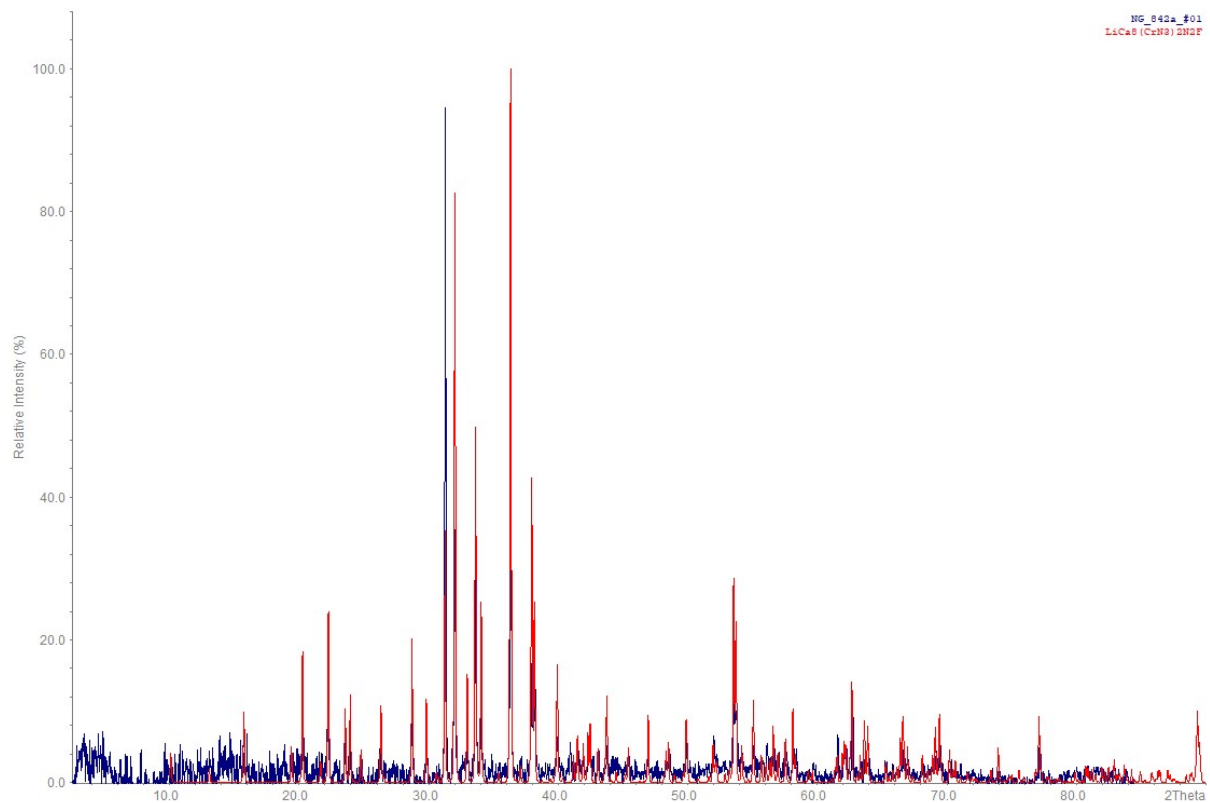

**Figure S6.** PXRD of ground crystals of  $\text{LiCa}_8[\text{CrN}_3]_2\text{N}_2\text{F}$  (in blue) and theoretical pattern calculated from single crystal data (in red).

## References

1. N. Glorizova, P. Höhn, unpublished work.
